# Supplementary material for: Antibiotics trigger initiation of SCCmec transfer by inducing SOS responses
Source: PubMed Central journal article supplement — Nucleic Acids Res. 2017 Mar 3;45(7):3944–52. doi: 10.1093/nar/gkx153 (PMC5397144; doi:10.1093/nar/gkx153), 2017-03-03
Supplement: gkx153_Supp.pdf [file gkx153_Supp.pdf]

## **Supplementary Material:**

SI Materials and Methods;

Figure S1. Effects of different concentrations of oxacillin on the SOS induction, *ccrC1* expression and *mecA* expression;

Figure S2. Identification of SCC*mec* excision;

Table S1. Isolates and plasmids used in this study;

Table S2. Primers for cloning, sequencing and qPCR;

Table S3. The minimum inhibitory concentrations (MIC) of the antibiotics for *S. haemolyticus* NW19

## SI Materials and Methods

**Construction of Reporter Strains for Gene Overexpression and Reduction.** To construct the promoterless reporter plasmid pCL::gfp, a fragment containing the *gfp* coding region with no promoter was amplified from pGLO with the primers gfpF and gfpR, and another fragment containing most of the pCL15Z elements was amplified from pCL15Z using the primers pCLF and pCLR. Two fragments were digested and ligated to obtain pCL::gfp. To construct the reporter plasmid pCL::ccr-gfp for the detection of *ccrCI* expression, a fragment containing 224 bp of the promoter upstream of the *ccrCI* initiation codon was amplified by PCR (ccrOPF and ccrOPR) from the NW19 genome and cloned into pCL::gfp upstream of the *gfp* coding region. The plasmid pCL::ccr-gfp was transformed into NW19 to obtain 19ccrgfp.

The plasmid pCL::ccr-gfp was used to construct gene overexpression and reduction reporters. The *recA* and *lexA* reading frames were amplified using the primers recAF/R and lexAF/R (Table S2) and cloned into pCL::ccr-gfp to yield pCL*recA*::ccr-gfp and pCL*lexA*::ccr-gfp, respectively. The plasmids were transformed into NW19 to obtain strains 19recUp and 19lexUp, respectively, to achieve exogenous expression of RecA and LexA. To construct the antisense sequences of *recA* and *lexA*, two regions of *recA* (471 bp) and *lexA* (515 bp) were amplified using irecAF/R and ilexAF/R and cloned into pCL::ccr-gfp, yielding pCL*recAi*::ccr-gfp and pCL*lexAi*::ccr-gfp, respectively. The plasmids were transformed into NW19 to give strains 19recDw and 19lexDw, respectively.

Plasmid pCL::ccr-gfp was used to further construct pCL::mutccr-gfp by site-directed mutagenesis of the putative SOS box in the *ccrCI* promoter. The primers ccrZmutF and ccrZmutR were used. In pCL::mutccr-gfp, the wild type SOS box TGAAACGAAATTATAAATA was mutated to TGAAAAAAAAAAATAAATA, the wild type -35 and -10 elements were retained, and the key LexA recognition sites were removed. Plasmid pCL::ccr-gfp was transformed into strain NW19 to give strain 19ccrgfp. All resulting plasmids were transferred via electroporation first to *S. aureus* RN4220 and subsequently to strain NW19.

**Gene Deletion and Complementation In the Mu50 Strain.** The lambda recombination cassette in

pKOR1 was replaced by multiple cloning sites (KpnI-EcoRI-NotI-BglII-SalI). The bleomycin resistance gene operon was amplified from the Mu50 genome and cloned downstream of the ColE1 plasmid replication origin (ori) by overlap PCR. The resulting vector pKZ2 was used for gene deletion in chloramphenicol-resistant MRS, and 1000 bp of the DNA regions located upstream (recA50upF and recA50upR) and downstream (recA50dwF and recA50dwR) of the *recA* gene were obtained by PCR of Mu50 genomic DNA. Two fragments were digested with KpnI/EcoRI (upstream) and EcoRI/SalI (downstream) and cloned into pKZ2, respectively, to yield plasmid pKZΔrecA50. The complementing plasmid pCLrecA50 was transformed into Mu50ΔrecA to give strain Mu50ΔrecA::precA. All plasmids from *E. coli* were transferred via electroporation first to *S. aureus* RN4220 and subsequently to strain Mu50.

**Purification of *S. aureus* LexA from *E. coli*.** BL21(DE3) cells (Invitrogen) carrying pCold-lexA were diluted 1:100 in the LB broth supplemented with ampicillin (100 μg/mL) and grown at 37°C until OD<sub>600</sub>=0.5. Cells were induced with 0.1 mM IPTG at 16°C for 24h. Induced cells were harvested and resuspended in a ice-cold binding buffer (50 mM Tris, 0.5 mM EDTA-2Na, 50 mM NaCl, 10% (v/v) Glycerol, 20 mM Imidazole). Resuspended cells were sonicated and centrifuged at 20,000 × g and 4°C for 1h. The supernatant was filtered through a 0.22-μm filter before it was applied to the column (HisTrap™ HP, GE). The purification experiments were performed according to the manufacturer's instructions. The elution buffer (50 mM Tris, 0.5 mM EDTA-2Na, 50 mM NaCl, 10% (v/v) Glycerol, 200 mM Imidazole) was pre-cooled before being used. The eluate was dialyzed in the stock buffer (10 mM Tris, 50 mM KCl, 10 mM DTT, 30% (v/v) Glycerol; pH 7.5) at 4°C for 12h. Dialyzed LexA protein was stored in a -80°C freezer.

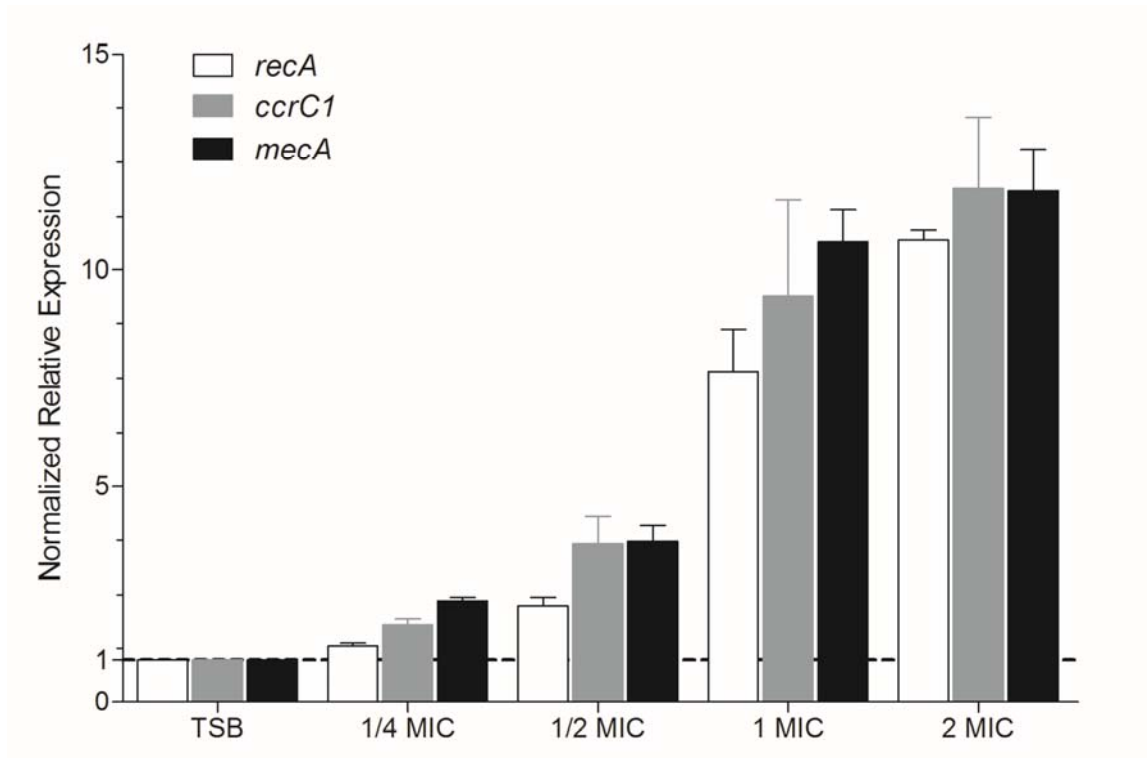

Figure S1. Effects of different concentrations of oxacillin on the SOS induction, *ccrC1* expression and *mecA* expression. Gene expression levels were normalized and are presented relative to the TSB cultured control. The expression of *recA* increases once SOS response is activated. The protein PBP2a encoded by *mecA* confers staphylococcus  $\beta$ -lactam resistance.

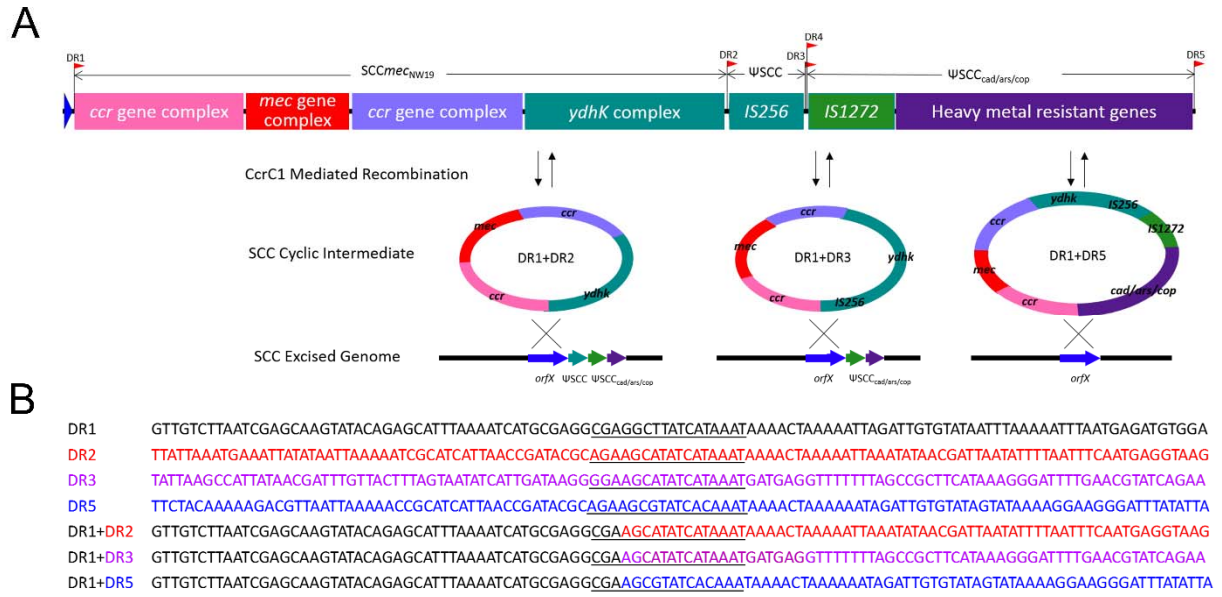

Figure S2. Identification of *SCCmec* excision. (A) Schematic diagram of the recombination of the *SCC* composite island in *S. haemolyticus* NW19. *SCC* excision occurs between different DR sites yielding various excised products. Gene complexes are shown as boxes, and the colors of the boxes represent different gene clusters. Red arrowheads (DR1, DR2, DR3, DR4 and DR5) indicate the locations of integration site sequences for the *SCC*. *SCCmec*<sub>NW19</sub> consists of the *ccrC1* allele 8 gene complex, the *mec* gene complex, the *ccrC1* allele 2 gene complex and the *ydhK* gene cluster, which might be associated with heavy metal resistance, metallo  $\beta$ -lactamase resistance and anion transposition.  $\Psi$ *SCC* harbors *IS256*, and  $\Psi$ *SCC*<sub>cad/ars/cop</sub> harbors resistance genes for cadmium, arsenic and copper. The three circles designate the *SCC* cyclic intermediates. The *orfX* gene is marked as a blue arrow. The sequences of the recombination sites are shown below. (B) Identification of recombination sites in the genome before and after the excision of *SCC* elements. The core sequences in direct repeats in the recombination site are underlined. The DNA sequences containing DR1, DR2, DR3 and DR5 are marked with black, red, purple and blue, respectively. The DNA sequences of DR1 + DR2, DR1 + DR3 and DR1 + DR5 are black if they are derived solely from DR1, red if they are from DR2, purple if they are from DR3 and blue if from DR5 after *SCC* excision by *CcrC1*-mediated recombination.

**Table S1.** Isolates and plasmids used in this study

| Strain and Plasmid                 | Characteristics                                                                            | Sources    |
|------------------------------------|--------------------------------------------------------------------------------------------|------------|
| <b>Strain</b>                      |                                                                                            |            |
| NW19                               | MRSH, type V(5C2&5) SCC <i>mec</i> , <i>ccrC1</i> allele 2 & <i>ccrC1</i> allele 8         | (1)        |
| 19ccrgfp                           | NW19 with pCL:: <i>ccr-gfp</i> reporter                                                    | This study |
| 19Mutccrgfp                        | NW19 with pCL:: <i>mutccr-gfp</i> reporter                                                 | This study |
| 19recUp                            | NW19 with pCL <i>recA</i> :: <i>ccr-gfp</i>                                                | This study |
| 19lexUp                            | NW19 with pCL <i>lexA</i> :: <i>ccr-gfp</i>                                                | This study |
| 19recDw                            | NW19 with pCL <i>recAi</i> :: <i>ccr-gfp</i>                                               | This study |
| 19lexDw                            | NW19 with pCL <i>lexAi</i> :: <i>ccr-gfp</i>                                               | This study |
| Mu50                               | MRSA, type II SCC <i>mec</i> , <i>ccrA2B2</i>                                              | Lab stocks |
| Δ <i>recA</i>                      | Mu50 with <i>recA</i> gene deleted                                                         | This study |
| Δ <i>recA</i> :: <i>precA</i>      | Mu50Δ <i>recA</i> with pCL <i>recA</i> 50                                                  | This study |
| <b>Plasmid</b>                     |                                                                                            |            |
| pCL15Z                             | <i>S. aureus</i> expression vector, Amp <sup>R</sup> , Cm <sup>R</sup> , Bleo <sup>R</sup> | (1)        |
| pCL:: <i>gfp</i>                   | pCL15Z carrying <i>gfp</i> coding sequence with no promoter                                | This study |
| pCL:: <i>ccr-gfp</i>               | pCL15Z with <i>ccrC1</i> :: <i>gfp</i> fusion                                              | This study |
| pCL <i>recA</i> :: <i>ccr-gfp</i>  | pCL:: <i>ccr-gfp</i> expressing <i>RecA</i> with IPTG induced promoter                     | This study |
| pCL <i>lexA</i> :: <i>ccr-gfp</i>  | pCL:: <i>ccr-gfp</i> expressing <i>LexA</i> with IPTG induced promoter                     | This study |
| pCL <i>recAi</i> :: <i>ccr-gfp</i> | pCL:: <i>ccr-gfp</i> decreasing the expression of <i>RecA</i> with IPTG induced promoter   | This study |
| pCL <i>lexAi</i> :: <i>ccr-gfp</i> | pCL:: <i>ccr-gfp</i> decreasing the expression of <i>LexA</i> with IPTG induced promoter   | This study |
| pCL:: <i>mutccr-gfp</i>            | pCL:: <i>ccr-gfp</i> with mutations in SOS box of <i>ccrC1</i> promoter                    | This study |
| pCold II                           | <i>E. coli</i> expression vector, Amp <sup>R</sup> , cspA promoter                         | Lab stocks |
| pCold II-lexA                      | NW19 <i>LexA</i> expression plasmid in <i>E. coli</i>                                      | This study |
| pCold II-lexA50                    | Mu50 <i>LexA</i> expression plasmid in <i>E. coli</i>                                      | This study |
| pKOR1                              | <i>S. aureus</i> shuttle vector                                                            | (2)        |
| pKZ2                               | <i>S. aureus</i> shuttle vector modified from pKOR1                                        | This study |
| pKZΔ <i>recA</i> 50                | Plasmid used for <i>recA</i> gene deletion in strain Mu50                                  | This study |
| pCL <i>recA</i> 50                 | Complemental plasmid for <i>recA</i> gene with its own promoter in Mu50                    | This study |

1. Liu P, Xue H, Wu Z, Ma J, Zhao X (2016) Effect of *bla* regulators on the susceptible phenotype and phenotypic conversion for oxacillin-susceptible *mecA*-positive staphylococcal isolates. *J Antimicrob Chemother* 71(8):2105-2112.
2. Bae T, Schneewind O (2006) Allelic replacement in *Staphylococcus aureus* with inducible counter-selection. *Plasmid* 55(1):58-63.

**Table S2.** Primers for cloning, sequencing and qPCR

| Primers                                  | Sequences (5'>3')                                                 |
|------------------------------------------|-------------------------------------------------------------------|
| LexAexpF                                 | CATGCCATGGATGAGAGAATTAACATAACGTCAAAGTG                            |
| LexAexpR                                 | CCGCTCGAGCAGTTCTCTGTATAAACCAATAACTTTACCG                          |
| Lex50expF                                | CGAGCTCAGAGAATTAACAAAACGACAAAGCG                                  |
| Lex50expR                                | GGGGTACCTTACATTTTCGCGGTACAAACCAATTACTTTCC                         |
| recAF                                    | AAGGAAAAAAGCGGCCGCGATTAACCTCGTTAATAGGAGGT<br>TTCG                 |
| recAR                                    | CGGGATCCCTATTCTTCAACGAATAATGTTTGAGGTG                             |
| irecAF                                   | CGCGGATCCGATATTAATACGATGATTAACCTCGTTAATAGGA<br>GG                 |
| irecAR                                   | AAAACCTGCAGGTCAACTACTACAATATCAACCGCACCA                           |
| lexAF                                    | AAGGAAAAAAGCGGCCGCGAGAGAATTAACATAACGTCAA<br>AGTG                  |
| lexAR                                    | CGGGATCCCTACAGTTCTCTGTATAAACCAATAACTTTACCG                        |
| ilexAF                                   | CGCGGATCCCTAAAATTAGGGAGTGCCTATATATGAGAGAATT                       |
| ilexAR                                   | CCCAAGCTTCTTCATCATCTTCAGTCATCGCAAC                                |
| ccrCOPF                                  | TGAACAAATTGAAGCATTG                                               |
| ccrCOPR                                  | CATATCATACCGCTCCTTTT                                              |
| mut1F                                    | AAAAACGAAATTATAAATATATATTATCT                                     |
| mut1R                                    | TATTTATAATTTTCGTTTTTTTTTTTATCA                                    |
| mut2F                                    | TGAAAAAAAATTATAAATATATATTATCT                                     |
| mut2R                                    | TATTTATAATTTTTTTTCATTTTTTATCA                                     |
| mut3F                                    | TGAAACGAAAAAATAAATATATATTATCT                                     |
| mut3R                                    | TATTTATTTTTTCGTTTCATTTTTTATCA                                     |
| recA50upF                                | GGGGTACCTGTATTAGAACATAAAGTTATTGGAGAT                              |
| recA50upR                                | GGAATTCATATTTTTTATCGATAATACAATTAATTTG                             |
| recA50dwF                                | GGAATTCATCTATAGTTAACTTAGCAAATATCCTT                               |
| recA50dwR                                | ACGCGTCGACATGTTTCGTCCTTCTCGTCC                                    |
| rec50-F                                  | AACCTGCAGGTATTATCGATAAAAATATAAGCACGT                              |
| rec50-R                                  | CGGGATCCCTTATAGTCTCGATTTGTAGTGTATCC                               |
| pCLF                                     | CCGCTCGAGCCAAGCTAATTCGGTGGAACG                                    |
| pCLR                                     | GGAATTCAACGGACAAAACCACTCAAAATAAA                                  |
| gfpF                                     | ATCTAATAAAAGGAGCGGTATGATATGGCTAGCAAAGGAGA<br>AGAACTTTTC           |
| gfpR                                     | AACCTGCAGTTATTTGTACAGTTCATCCATGCCATGTG                            |
| ccrOPF                                   | GAAGATCTTGAACAAATTGAAGCATTGTAGAAG                                 |
| ccrOPR                                   | GGCCGACGTCGACATCATACCGCTCCTTTTATTAGATTATT                         |
| ccrZmutF                                 | AGTGGTAAAAGTGATAAAAATGAAAAAAAAAAAAATAAATATA<br>TATTATCTATATGTTGTT |
| ccrZmutR                                 | AACAACATATAGATAATATATATTTATTTTTTTTTTTTCATTTTT<br>ATCACTTTTACCACT  |
| ccrAOPF                                  | CCATAAATATATATTATTACTGTGAAAGGAGGAGCCGATATG<br>AAACAAGTCATAGGCTA   |
| ccrAOPR                                  | TAGCCTATGACTTGTTTCATATCGGCTCCTCCTTTTCACAGTA<br>ATAATATATATTATGG   |
| <b>Primers for detection of excision</b> |                                                                   |
| DR1F                                     | AAAGCACCTGAAAATATGAGC                                             |

---

|      |                          |
|------|--------------------------|
| DR1R | TTTCATTCTTTCTTGATTCCATTA |
| DR2F | GCTGGTATTTTAGCATTTATCGG  |
| DR2R | TGTGCCAATTTTCGCTTCATTC   |
| DR3F | TTCGTTGATTTTCCATTAGTTG   |
| DR3R | TGTAGATTTTGGCTTATTCACCTC |
| DR5F | GCTTGGGACAGTTGTTGCTTT    |
| DR5R | ATAGGAGCAATTCTCATAGCC    |

**Primers for RT-PCR**

|                       |                                |
|-----------------------|--------------------------------|
| ccrC1RTF              | GTGGAGATTTCTACTTACGTG          |
| ccrC1RTR              | TATAATACGTCCGTCGACA            |
| recARTF               | GATAAATGCAGCAACGCCAC           |
| recARTR               | CGCCGTGTTTCAAGTGTT             |
| lexARTF               | TACGAAACCGAGAGCCAT             |
| lexARTR               | CCGGCAGTAACTTTACCA             |
| ccrARTF               | ATGGGCTTCAAGAAAAAGCA           |
| ccrARTR               | GCCTTTACCGTTGGTGACTC           |
| rec50RTF              | AAATAAAGTGGCACCACCATT          |
| rec50RTR              | TTCTTCAACATCACCATCAGA          |
| lex50RTF              | TAACAAAACGACAAAGCGAA           |
| lex50RTR              | CGTGAAAGATGACCATGAAC           |
| B1F <sup>†</sup>      | CACACTGGAAGTGGAGACACG          |
| B1R <sup>†</sup>      | CTGCTGGCACGTAGTTAG             |
| DR12EGRT              | TACAACGCAGCAACTACGCA           |
| DR12EGRT              | ATTCTTTAGATTTTCATTTTTCAGCCC    |
| tpiRTF <sup>‡</sup>   | AGAAACTTCTCCAGTGGCATTAGCTGA    |
| tpiRTR <sup>‡</sup>   | ATTTCATTAGCTTTGCCATTTTCGCGTTC  |
| EG50RTF               | GCAGTAACTACGCACTATCATTAG       |
| EG50RTR               | GATATATCTTATATATTGAATGAACGTGGA |
| tpi50RTF <sup>§</sup> | TAAAGAAGGAAAAGCACAAGG          |
| tpi50RTR <sup>§</sup> | TTCAGAATGACCGATAACAAC          |

---

<sup>†</sup>, reference gene, *Staphylococcus aureus* 16S RNA (from 320bp-532bp); <sup>‡</sup>, one copy housekeeping gene as reference for excision detection in NW19; <sup>§</sup>, reference gene for excision detection in Mu50.

**Table S3.** The minimum inhibitory concentrations (MIC) of the antibiotics for *S. haemolyticus* NW19.

| <b>Antibiotic</b> | <b>MIC (mg/L)</b> |
|-------------------|-------------------|
| Oxacillin         | 0.25              |
| Teicoplanin       | 16                |
| Vancomycin        | 2                 |
| Gentamicin        | 512               |
| Kanamycin         | 512               |
| Tetracycline      | 64                |
| Sulfamethoxazole  | 256               |
| Ciprofloxacin     | 32                |
| Trimethoprim      | 1                 |
